# Supplementary material for: Genome-Wide Analysis of Milk Production Traits and Selection Signatures in Serbian Holstein-Friesian Cattle
Source: MDPI journal article supplement (doi:10.3390/ani14050669), 2024-02-21
Supplement: s1 [file s1]

**Supplementary Table S1.** Detected selection signatures and the association found by other authors.

| Chr. | Genomic location Mbp | Animals within ROH % | Genes                                                                                                                                                    | Previously published results                                                                                                                                                                                                                      |
|------|----------------------|----------------------|----------------------------------------------------------------------------------------------------------------------------------------------------------|---------------------------------------------------------------------------------------------------------------------------------------------------------------------------------------------------------------------------------------------------|
| 1    | 83-84                | 44.95                | <i>MAGEF1, MIR2284Y-3, EPHB3, LOC524771, THPO, POLR2H, CLCN2, FAM131A, PSMD2, ECE2, CAMK2N2, ALG3, MIR1224, ABCF3, AP2M1, HTR3C, ABCC5, PARL, MAP6D1</i> | Identified signature of selection on the genomic region 1:82 820 000-84 650 000, in a local cattle population from North Africa (Ben-Jemaa et al. 2020)                                                                                           |
|      |                      |                      |                                                                                                                                                          | The <i>ECE2</i> gene was associated with susceptibility to respiratory diseases in Charolais, Hereford, Red Angus and Angus cattle (Neupane et al. 2018).                                                                                         |
| 1    | 84-85                | 44.95                | <i>YEATS2, KLHL24, B3GNT5, LAMP3, MCCC1, DCUN1D1</i>                                                                                                     | Serão et al. (2013) found an association of this region with residual feed intake (RFI) in Angus and Simmental cattle breeds.                                                                                                                     |
| 7    | 42-43                | 39.74                | <i>NLRP3</i>                                                                                                                                             | The <i>NLRP3</i> gene is associated with resistance to infection with <i>Mycobacterium avium</i> ssp. <i>paratuberculosis</i> in HF cattle (Mallikarjunappa et al. 2018)                                                                          |
| 7    | 43-44                | 40.72                | <i>MGC137030, LYPD8, SH3BP5L, ZNF692</i>                                                                                                                 | <i>LYPD8</i> is involved in the biological processes of defense responses to gram-negative bacteria and is associated with adaptive responses to environmental stimuli such as stress, infection and inflammation in cattle (Pošćić et al. 2017). |
| 10   | 72-73                | 31.92                | <i>L3HYPDH, JKAMP, CCDC175, DHRS7, PPM1A, SIX6</i>                                                                                                       | Gaddis et al. (2017) linked the <i>DHRS7</i> and <i>SIX6</i> genes to the number of embryos in HF cows.                                                                                                                                           |
| 10   | 73-74                | 31.92                | <i>MNAT1, TRMT5, PRKCH</i>                                                                                                                               | <i>PRKCH</i> was associated with back angle in HF cows (Yan et al. 2020).                                                                                                                                                                         |
| 16   | 42-43                | 36.81                | <i>DHRS3, VPS13D, TNFRSF1B, MIIP, MFN2, PLOD1, KLAA20I3, NPPB, NPPA, CLCN6</i>                                                                           | In the Yaroslav, Kolmogor and HF breeds, a selection signature was identified in the same region (Zinovieva et al. 2020).                                                                                                                         |

|    |       |       |                                                                                                                                                                                                                                                                                                                                                              |                                                                                                                                                                                 |
|----|-------|-------|--------------------------------------------------------------------------------------------------------------------------------------------------------------------------------------------------------------------------------------------------------------------------------------------------------------------------------------------------------------|---------------------------------------------------------------------------------------------------------------------------------------------------------------------------------|
|    |       |       | <i>MTHFR</i> , <i>MIR12050</i> ,<br><i>AGTRAP</i> , <i>DRAXIN</i> ,<br><i>MAD2L2</i> , <i>FBXO6</i> ,<br><i>FBXO44</i> , <i>FBXO2</i>                                                                                                                                                                                                                        | <i>MTHFR</i> is involved in milk protein synthesis (Menzies et al. 2009).                                                                                                       |
| 16 | 43-44 | 37.46 | <i>DISP3</i> , <i>ANGPTL7</i> ,<br><i>EXOSC10</i> , <i>SRM</i> ,<br><i>MASP2</i> , <i>TARDBP</i> ,<br><i>PEX14</i>                                                                                                                                                                                                                                           | <i>EXOSC10</i> is associated with longevity in HF cows (Steri et al. 2019).                                                                                                     |
| 16 | 44-45 | 36.81 | <i>DFFA</i> , <i>CORT</i> , <i>CENPS</i> ,<br><i>PGD</i> , <i>UBE4B</i> ,<br><i>LOC112441838</i> ,<br><i>NMNAT1</i> , <i>CTNNBIP1</i> ,<br><i>PIK3CD</i> , <i>TMEM201</i>                                                                                                                                                                                    | <i>NMNAT1</i> is associated with reproductive efficiency of cows (Mota et al. 2017)                                                                                             |
| 16 | 45-46 | 30.29 | <i>SPSB1</i> , <i>MIR34A</i> ,<br><i>SLC2A5</i> , <i>CA6</i> , <i>ENO1</i> ,<br><i>MIR2285CK</i> , <i>SLC45A1</i> ,<br><i>LOC786597</i>                                                                                                                                                                                                                      | <i>ENO1</i> gene was significantly associated with bull fertility (Park et al. 2012)                                                                                            |
| 22 | 21-22 | 30.62 | <i>EDEM1</i> , <i>ARL8B</i> ,<br><i>BHLHE40</i> , <i>ITPR1</i> ,<br><i>MIR2285AM</i>                                                                                                                                                                                                                                                                         | <i>BHLHE40</i> is associated with milk protein content (Singh et al. 2022)                                                                                                      |
| 22 | 22-23 | 34.20 | <i>SUMF1</i> , <i>SETMAR</i> ,<br><i>LRRN1</i>                                                                                                                                                                                                                                                                                                               | <i>SUMF1</i> gene is associated with milk yield in HF cows (Pedrosa et al. 2021)                                                                                                |
| 26 | 21-22 | 37.13 | <i>CHUK</i> , <i>CWF19L1</i> ,<br><i>SCD</i> , <i>MIR12016</i> ,<br><i>SEC31B</i> , <i>NDUFB8</i> ,<br><i>HIF1AN</i> , <i>SLF2</i> ,<br><i>SEMA4G</i> , <i>MRPL43</i> ,<br><i>TWINK</i> , <i>LZTS2</i> , <i>SFXN3</i> ,<br><i>TLX1</i> , <i>LBX1</i>                                                                                                         | <i>SCD</i> gene is associated with medium- and long-chain unsaturated fatty acids in a population of Chinese HF cows (Li et al. 2016).                                          |
| 26 | 22-23 | 42.02 | <i>BTRC</i> , <i>POLL</i> , <i>DPCD</i> ,<br><i>FBXW4</i> , <i>FGF8</i> , <i>NPM3</i> ,<br><i>OGA</i> , <i>KCNIP2</i> , <i>HPS6</i> ,<br><i>PPRC1</i> , <i>NOLC1</i> ,<br><i>ELOVL3</i> , <i>PITX3</i> ,<br><i>GBF1</i> , <i>NFKB2</i> , <i>PSD</i> ,<br><i>FBXL15</i> , <i>CUEDC2</i> ,<br><i>MIR146B</i> , <i>MFSD13A</i> ,<br><i>ACTR1A</i> , <i>SUFU</i> | Wang et al. (2017) observed a significant increase in <i>MIR146B</i> expression levels in subclinical, clinical and experimental mastitis-infected bovine mammary gland tissue. |
| 26 | 23-24 | 34.85 | <i>TRIM8</i> , <i>ARL3</i> , <i>SFXN2</i> ,<br><i>MIR2392</i> , <i>CYP17A1</i> ,<br><i>AS3MT</i> , <i>CNNM2</i> ,<br><i>NT5C2</i>                                                                                                                                                                                                                            | <i>CNNM2</i> was associated with milk yield in HF cows (Jiang et al. 2019a).                                                                                                    |
